# Supplementary material for: A highly electropositive ReS2 based ultra-sensitive flexible humidity sensor for multifunctional applications
Source: Royal Society of Chemistry journal article supplement (doi:10.1039/d1nj00064k), 2021-01-01
Supplement: d1nj00064k1.pdf [file d1nj00064k1.pdf]

## Supplementary Information

### Highly Electropositive ReS<sub>2</sub> Based Ultra-Sensitive Flexible Humidity Sensor for Multifunctional Applications

Vivek Adepu<sup>1</sup>, Naveen Bokka<sup>1</sup>, Venkat Mattela<sup>2</sup>, and Parikshit Sahatiya<sup>1\*</sup>

<sup>1</sup> Department of Electrical and Electronics Engineering, Birla Institute of Technology and Science Pilani Hyderabad Campus, Hyderabad, 500078, India.

<sup>2</sup>Ceremorphic, Inc. San Jose, California, 95131, USA

\*Corresponding author: E-mail: parikshit@hyderabad.bits-pilani.ac.in; Telephone: 040-66303617

#### ReS<sub>2</sub> sensor characterization

The long-term stability of the ReS<sub>2</sub> based humidity sensor was seen by plotting sensitivity against the number of days. From figure SI 1 it is evident that the sensitivity of the fabricated sensor was

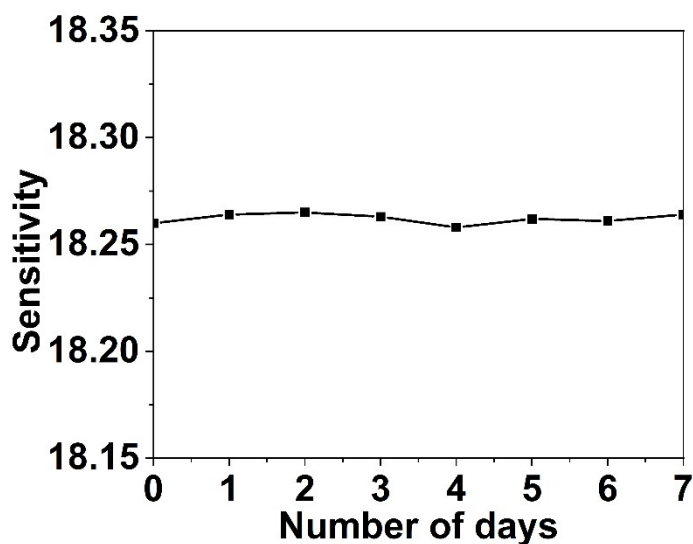

approximately 18.26 over one week.

**Figure SI 1:** Plot showing long-term stability of ReS<sub>2</sub> based humidity sensor, wherein sensitivity was plotted against the number of days.
